# Supplementary material for: Dual Piezoelectric Energy Investing and Harvesting Interface for High-Voltage Input
Source: MDPI journal article supplement (doi:10.3390/s21072357), 2021-03-28
Supplement: s1 [file s1]

## Article

# Dual Piezoelectric Energy Investing and Harvesting Interface for High Voltage Input

Muhammad Bilawal Khan <sup>1</sup>, Hassan Saif <sup>2</sup>, Kyoungho Lee <sup>3</sup> and Yoonmyung Lee <sup>1,\*</sup>

<sup>1</sup> Department of Electrical and Computer Engineering, Sungkyunkwan University, Suwon 16419, Korea; bilawal786@skku.edu

<sup>2</sup> Department of Electrical Engineering, National University of Computer and Emerging Sciences, Islamabad 44000, Pakistan; hassan.saif@nu.edu.pk

<sup>3</sup> Korea Electrotechnology Research Institute, Changwon 51543, Korea; khlee93@keri.re.kr

\* Correspondence: yoonmyung@skku.edu

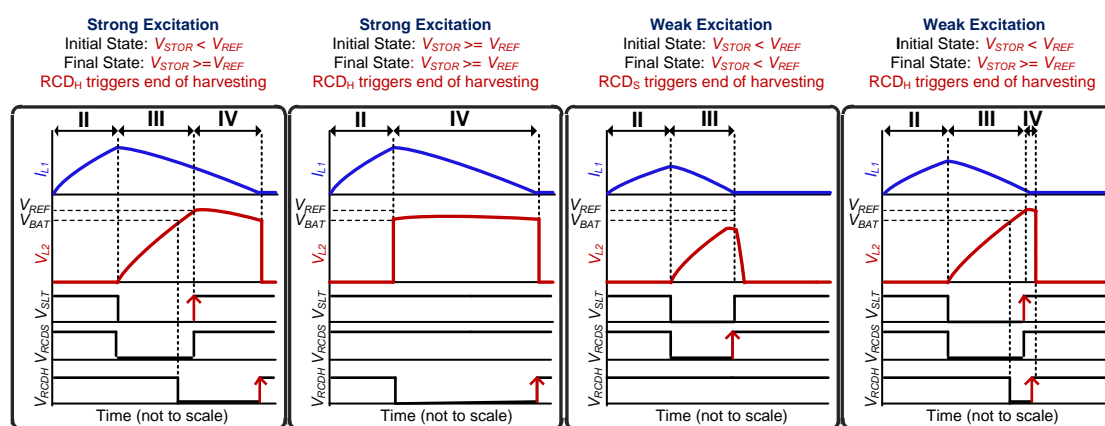

**Figure S1.** Conceptual waveform for the cases of harvesting and storage decisions made by HIC (a) Energy transferred to both  $C_{STOR}$  and battery, where SLT determines the end of energy transfer to  $C_{STOR}$ , (b) Energy transferred to battery only, (c) Energy transferred to  $C_{STOR}$  only, where RCDs determines the end of energy transfer to  $C_{STOR}$ , (d) Energy transferred to both  $C_{STOR}$  and battery, where SLT determines the end of energy transfer to  $C_{STOR}$  and RCD<sub>H</sub> immediately determines end of energy transfer to the battery.
